# Supplementary material for: HZSM-5 zeolite modification and catalytic reaction mechanism in the reaction of cyclohexene hydration
Source: Royal Society of Chemistry journal article supplement (doi:10.1039/d2ra04285a), 2022-01-01
Supplement: d2ra04285a1.pdf [file d2ra04285a1.pdf]

## Calculation method

DFT calculations were performed using the DMOL<sub>3</sub> module in Materials Studio 2017 software, employing the hyper generalized approximate gradient (m-GGA) with M60-L for all atoms [31]. The m-GGA density functional offered thermodynamic, kinetic, non-covalent interaction, bond length, reaction energy barrier, and vibrational frequency advantages. We adopted dual-value polarization basis set polarization function to consider electron polarization effects. All electronic calculations were performed on the complex domain with unrestricted system spin state, i.e., SCF =  $1.0 \times 10^{-5}$ , maximum SCF cycles = 800, and maximum iterations = 800.

We used a full LST/QST to search for transition states and hence determine the activation energy for a specific path. Only one imaginary frequency corresponds to the expected atomic motion in each transition structure. Convergence thresholds for energy, gradient, and displacement were  $2.0 \times 10^{-5}$  Ha, 0.004 Ha/Å, and 0.005 Å, respectively. Eyring [32] proposed the transition state theory for chemical reactions due to elementary reaction ( $E_a$ ) activation energy could be expressed as:

$$\Delta E = E(P) - EI \quad (1)$$

$$E_a = E(TS) - EI \quad (2)$$

Where EI, E(TS), and E(P) are electronic ground state energies for the reactant, transition, and product state, respectively. All energies were corrected by zero-point vibrational energy and Gibbs free energy.

## Material characterization

Analyses were performed using X-ray diffraction (XRD), Shimadzu Corporation XRD 6000, Using Cu target (K $\alpha$  ray,  $\lambda = 1.4518$  Å), Ni filter, working condition of 40 kV, working current of 30 mA, scanning within  $2\theta = 10^\circ \sim 80^\circ$ , and scanning speed of  $20^\circ/\text{min}$ ; Fourier Transform Infrared Spectroscopy (FT-IR), Thermo Corporation of America Nicolet-380, Using KBr as the background, according to the ratio of catalyst to KBr of 1:200, the tablet was pressed at a pressure of 1.75 Mpa for 1 min, and the sample was scanned after the tablet was pressed.; Temperature-programmed desorption

analysis of  $\text{NH}_3$  ( $\text{NH}_3$ -TPD), American Micromeritics Auto Chem II 2920, The samples were replaced in nitrogen at 200 °C for 1 h, and then  $\text{NH}_3$  was used for adsorption. Nitrogen gas was introduced into the reactor for 20 min, and then the TPD curve was recorded by increasing the temperature from 30 °C to 700 °C at a rate of 10 °C/min; Pyridine adsorption infrared spectroscopy (Py-IR), Germany Bruker Optics Tensor 27, The samples were pretreated at high temperature and high vacuum for 2 hours before pyridine adsorption, and then vacuum heated in situ; Scanning Electron Microscopy Analysis (SEM), Nippon Electronics Co., Ltd. JSM-7900F, The sample powders were modified by gold spraying and then characterized by scanning electron microscopy operating at 1.0 kV; Specific surface area and pore volume and pore size analysis (BET), American Micromeritics ASAP2020, The sample was first evacuated, and then high-purity nitrogen was used as the adsorbate, and the liquid nitrogen was adsorbed at low temperature to determine the specific surface area and pore volume of the sample; Contact angle (CA), German Dataphysics JY-82B Kruss DSA, The samples were compressed to a thickness of 2 mm and placed in a 1 cm disc (OD) and characterization determinations were made using optical contact angle measurements and ink droplet profiles; Thermogravimetric-Differential Thermal Analysis (TGA), Germany Netzsch STA 449C, Weigh 8 mg of sample, use high-purity nitrogen as protective gas, increase the temperature from 25 °C to 800 °C at a heating rate of 10 °C/min, and record the weight loss of the sample; X-ray photoelectron spectroscopy (XPS), Thermo Corporation of America Scientific K-Alpha to confirm successful acid treatment and OTS grafting and subsequent effects. We subsequently evaluated HCl-OTS-HZSM-5 effects for cyclohexene hydration under various conditions.

## Table information

Table. S1 Number of Mulliken electron layouts and distances between atoms before and after cyclohexene adsorption

| Cyclohexene<br>atomic<br>distribution | Mulliken electron layout<br>number (e) |                     | Cyclohexene<br>atomic<br>distribution | Atomic distance (Å)  |                                |
|---------------------------------------|----------------------------------------|---------------------|---------------------------------------|----------------------|--------------------------------|
|                                       | Before<br>adsorption                   | After<br>adsorption |                                       | Before<br>adsorption | After<br>adsorption            |
|                                       | C <sub>1</sub>                         | -0.132              |                                       | -0.089               | C <sub>1</sub> -C <sub>2</sub> |
| C <sub>2</sub>                        | -0.131                                 | -0.293              | C <sub>2</sub> -C <sub>3</sub>        | 1.494                | 1.504                          |
| C <sub>3</sub>                        | -0.385                                 | -0.54               | C <sub>3</sub> -C <sub>4</sub>        | 1.523                | 1.502                          |
| C <sub>4</sub>                        | -0.348                                 | -0.453              | C <sub>4</sub> -C <sub>5</sub>        | 1.520                | 1.523                          |
| C <sub>5</sub>                        | -0.347                                 | -0.503              | C <sub>5</sub> -C <sub>6</sub>        | 1.523                | 1.484                          |
| C <sub>6</sub>                        | -0.385                                 | -0.528              | C <sub>6</sub> -C <sub>1</sub>        | 1.494                | 1.333                          |
| H <sub>C1</sub>                       | 0.158                                  | 0.220               | C <sub>1</sub> -H                     | 1.088                | 1.079                          |
| H <sub>C2</sub>                       | 0.158                                  | 0.274               | C <sub>2</sub> -H                     | 1.088                | 1.099                          |
| H <sub>C31</sub>                      | 0.181                                  | 0.234               | C <sub>3</sub> -H                     | 1.097                | 1.083                          |
| H <sub>C32</sub>                      | 0.181                                  | 0.259               | C <sub>4</sub> -H                     | 1.098                | 1.090                          |
| H <sub>C41</sub>                      | 0.172                                  | 0.213               | C <sub>5</sub> -H                     | 1.095                | 1.087                          |
| H <sub>C42</sub>                      | 0.172                                  | 0.258               | C <sub>6</sub> -H                     | 1.101                | 1.079                          |
| H <sub>C51</sub>                      | 0.172                                  | 0.239               |                                       |                      |                                |
| H <sub>C52</sub>                      | 0.172                                  | 0.247               |                                       |                      |                                |
| H <sub>C61</sub>                      | 0.181                                  | 0.247               |                                       |                      |                                |
| H <sub>C62</sub>                      | 0.181                                  | 0.300               |                                       |                      |                                |
| SUM                                   | 0                                      | 0.085               |                                       |                      |                                |

Table. S2 The number of Mulliken electron layouts and the distance between atoms before and after the adsorption of 34T-HZSM-5

| 34T-HZSM-5<br>atomic<br>distribution | Mulliken electron layout<br>number (e) |                     | 34T-HZSM-<br>5<br>atomic<br>distribution | Atomic distance (Å)  |                     |
|--------------------------------------|----------------------------------------|---------------------|------------------------------------------|----------------------|---------------------|
|                                      | Before<br>adsorption                   | After<br>adsorption |                                          | Before<br>adsorption | After<br>adsorption |
|                                      | H                                      | 0.568               |                                          | 0.616                | O <sub>A</sub> -H   |
| O <sub>A</sub>                       | -1.192                                 | -1.237              | Al-O <sub>A</sub>                        | 1.828                | 1.816               |
|                                      |                                        |                     | Si-O <sub>A</sub>                        | 1.673                | 1.670               |
